# Supplementary material
Source: Copernicus journal article supplement (doi:10.5194/egusphere-2026-3455)

Supplementary Figure 1.

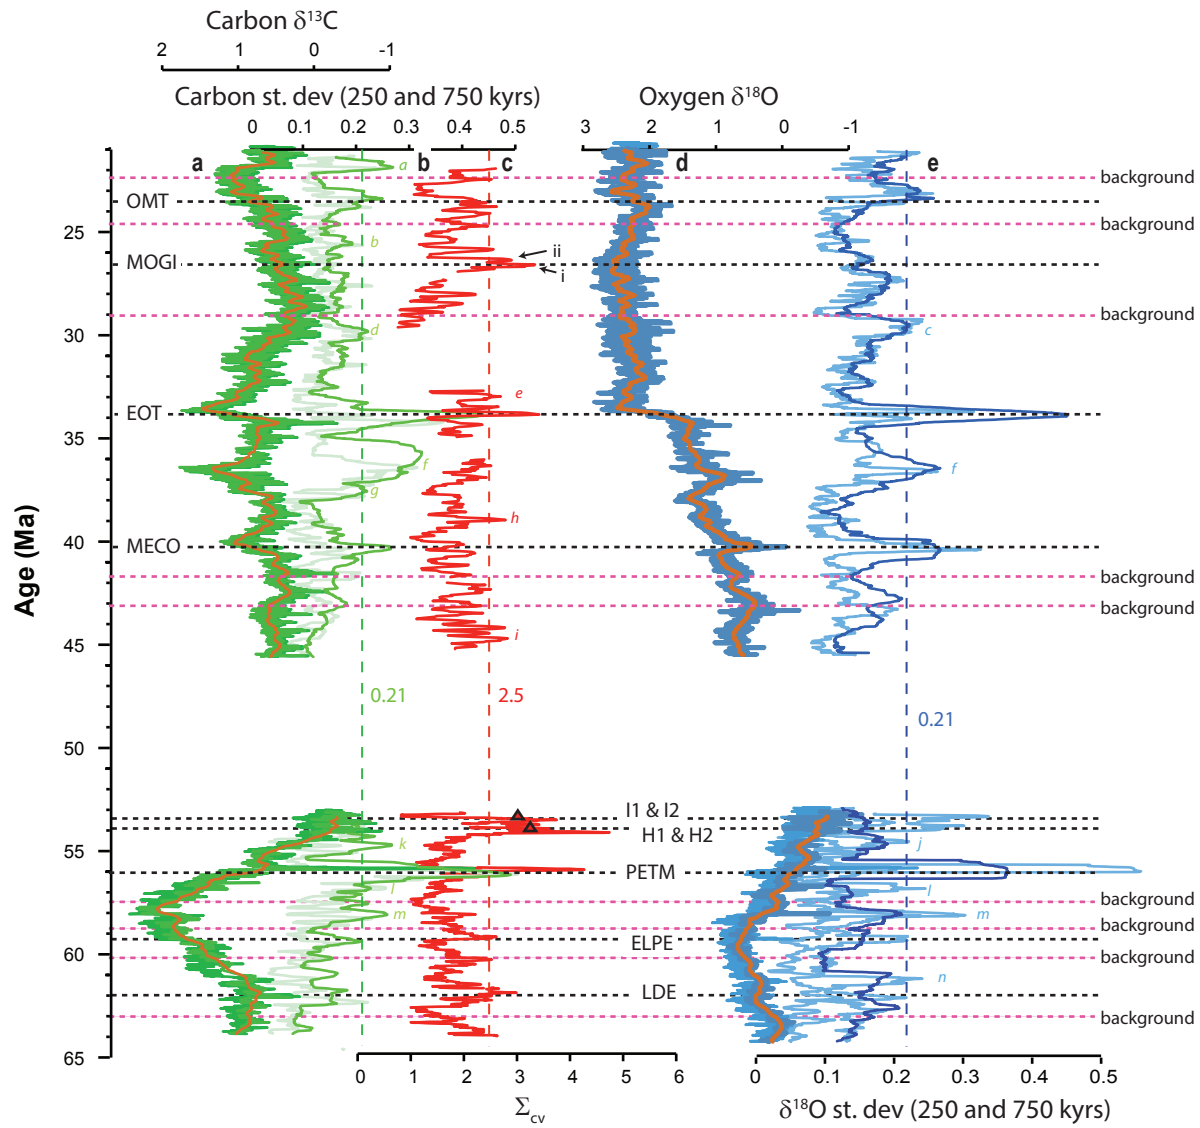

Supplement: Supplementary file 1 [file Plankton_resistance_supp_F1.pdf › Plankton_resistance_supp_F1.pdf]
